# Supplementary material for: Copy number and targeted mutational analysis reveals novel somatic events in metastatic prostate tumors
Source: HighWire-hosted journal article supplement (doi:10.1101/gr.107961.110), 2010-12-08
Supplement: SolSNP_Equations.pdf [file SolSNP_Equations.pdf]

# SolSNP

August 15, 2010

## 1 Some preliminaries on Kolmogorov-Smirnov statistic

Kolmogorov-Smirnov statistic is a distance measure that determines whether two empirical distributions are same.

For a given set  $X$  and a subset  $A \subset X$ , the characteristic function

$$\chi_A : X \rightarrow \mathbb{R}$$

is defined by

$$\begin{aligned}\chi_A(x) &= 1 \text{ if } x \in A \\ &= 0 \text{ otherwise}\end{aligned}$$

We denote the characteristic function of the interval  $(-\infty, \alpha)$ ,  $\alpha \in \mathbb{R}$  by  $\chi_\alpha$  for brevity. For  $n$  observations of a random variable  $X$  the cumulative distribution function  $F^X$  is given by

$$F^X(\alpha) = \frac{1}{n} \sum_{x \in X} \chi_\alpha(x) \text{ where } x \in X$$

Given two random variables  $X$  and  $X'$  with  $n$  observations the Kolmogorov statistic is given by

$$D(X, X') = \sup_{\alpha} |F^X(\alpha) - F^{X'}(\alpha)|$$

## 2 Adapting Kolmogorov-Smirnov statistic for Sol-SNP

Given a sampling distribution  $X_S$  with a pileup length of  $n$  then we consider the expected distributions  $X_{ref}$  and  $X_{nonref}$  in case of a haploid genome and

an additional  $X_{het}$  in case of diploid. These expected distributions have same length as  $X_S$ .

To adapt the above statistic to determine a variant we define the function  $f_\alpha$  to be

$$f_\alpha(x) = (1 - p_\epsilon(x))\chi_\alpha(x)$$

where  $x \in X$  and  $p_\epsilon(x)$  is the probability of error in the base call as indicated by the quality score.

We replace  $\chi_\alpha$  by  $f_\alpha$  in the definition of  $F^X$ . We use the same pileup of quality scores to determine  $F^{X_i}$  for  $i \in I = \{ref, nonref, het\}$ . Let  $D_i$  denote  $D(X_S, X_i)$  for  $i \in I$  then we define

$$D = \min\{D_i, i \in I\}$$

If  $D$  corresponds to  $X_{nonref}$  or  $X_{het}$  on both the strands then a variant is determined. The associated confidence score is then

$$-10 \log_{10}(\frac{D_F + D_R}{2})$$

where  $D_F$  and  $D_R$  are the  $D$  values from forward and reverse strand respectively.
