# Supplementary material for: Copy number and targeted mutational analysis reveals novel somatic events in metastatic prostate tumors
Source: HighWire-hosted journal article supplement (doi:10.1101/gr.107961.110), 2010-12-08
Supplement: Supplemental_Table_1_and_Methods.pdf [file Supplemental_Table_1_and_Methods.pdf]

**Supplemental Table 1.**

| <b>SUMMARY OF BFAST ALIGNMENTS AGAINST TARGET REFERENCE</b> |                            |                                 |                                                |                                                |                                                  |
|-------------------------------------------------------------|----------------------------|---------------------------------|------------------------------------------------|------------------------------------------------|--------------------------------------------------|
| <b>Sample</b>                                               | <b>Total Aligned Reads</b> | <b>Total Aligned Bases (Mb)</b> | <b>Reads Aligned Against Amplicon Sequence</b> | <b>Bases Aligned Against Amplicon Sequence</b> | <b>Percent Aligned Against Amplicon Sequence</b> |
| RA37N                                                       | 10672738                   | 534                             | 9224675                                        | 461                                            | 86.43                                            |
| RA37T                                                       | 3773678                    | 189                             | 3059045                                        | 153                                            | 81.06                                            |
| RA45AN                                                      | 8056178                    | 403                             | 6540648                                        | 327                                            | 81.19                                            |
| RA45M                                                       | 10613505                   | 531                             | 9259689                                        | 463                                            | 87.24                                            |
| RA45RM                                                      | 6590092                    | 330                             | 4953946                                        | 248                                            | 75.17                                            |
| RA45AT                                                      | 8295082                    | 415                             | 6593130                                        | 330                                            | 79.48                                            |
| RA48RN                                                      | 11928664                   | 596                             | 10826228                                       | 541                                            | 90.76                                            |
| RA48RM                                                      | 10328977                   | 516                             | 9180672                                        | 459                                            | 88.88                                            |
| RA49NS                                                      | 9641061                    | 482                             | 7707022                                        | 385                                            | 79.94                                            |
| RA49LT                                                      | 7292523                    | 365                             | 5613472                                        | 281                                            | 76.98                                            |
| RA53M                                                       | 10977661                   | 549                             | 9706908                                        | 485                                            | 88.42                                            |
| RA53T                                                       | 8433215                    | 422                             | 7209541                                        | 360                                            | 85.49                                            |
| <b>SUMMARY OF BFAST ALIGNMENTS AGAINST WHOLE GENOME*</b>    |                            |                                 |                                                |                                                |                                                  |
| RA37N                                                       | 18182314                   | 909                             | 9525943                                        | 476                                            | 52.39                                            |
| RA37T                                                       | 5493203                    | 275                             | 3157205                                        | 158                                            | 57.47                                            |
| RA45AN                                                      | 14720289                   | 736                             | 6788528                                        | 339                                            | 46.12                                            |
| RA45M                                                       | 16619153                   | 831                             | 9638236                                        | 482                                            | 57.99                                            |
| RA45RM                                                      | 14774691                   | 739                             | 5055057                                        | 253                                            | 34.12                                            |
| RA45AT                                                      | 15697659                   | 785                             | 6769725                                        | 338                                            | 43.13                                            |
| RA48RN                                                      | 16962721                   | 848                             | 11217146                                       | 561                                            | 66.13                                            |
| RA48RM                                                      | 16225405                   | 811                             | 9468204                                        | 473                                            | 58.35                                            |
| RA49NS                                                      | 18361830                   | 918                             | 8024030                                        | 401                                            | 43.70                                            |
| RA49LT                                                      | 16412566                   | 821                             | 5528827                                        | 276                                            | 33.69                                            |
| RA53M                                                       | 17078441                   | 854                             | 10158923                                       | 508                                            | 59.48                                            |
| RA53T                                                       | 14548824                   | 727                             | 7548495                                        | 377                                            | 51.88                                            |

\* - Reference genome was NCBI Build 36, hg18

## **Supplemental Methods**

### *Sequence Alignment*

SOLiD NGS csfasta and quality files were used for alignment against a human genome reference (Build 36, hg18) fasta file using BFAST (Homer et al. 2009). This alignment tool relies on indexing of reads to rapidly map each read to its most likely position within the reference, while allowing for read errors and mismatches to insure detection of possible sequence variants (Homer et al. 2009). A final local alignment using a Smith-Waterman method is performed for each read, allowing for gaps to detect potential small indels. The BFAST output files are in the binary alignment format (BAM) (Li et al. 2009). These final BAM files are input files for variant detection algorithms. To assess alignment performance of SOLiD sequenced RainDance PCR products, we calculated percent uniquely mappable reads and percent reads mapping to the target regions. These results are provided in Supplemental Table 1.

### *Variant Detection*

The PCR duplicate removed BAM files for each sample were used for variant detection using two independent algorithms. We used the algorithm SolSNP version 1.0 (Sinari et al. 2010) to detect variants. SolSNP is an individual sample variant detector (classifier) implemented in Java. The variant calling is based on a modified Kolmogorov-Smirnov like statistic. The algorithm is non-parametric and makes no assumptions on the nature of the data. It compares the discrete sampled distribution, the pileup on each strand, to the expected distributions (according to ploidy). An important aspect of SolSNP that reduces overcalling

inherent to the K-S statistic algorithm is that filters are included to reduce false positive rates, among of which is that both strands must provide evidence for the variation. Zero quality bases are trimmed off the pileup before the comparisons. It is a standalone program that can be run from the command line and is general enough to work with any next generation sequencing data with high (~9X) coverage. Furthermore, a Call Bias filter is available, which allows a heterozygous variant to be classified even if it falls outside of the normal distribution for a heterozygous variant within a pileup. This is very important in the case of cancer, where heterozygous alleles fall far outside of the normal diploid distribution based on the amount of normal contaminating stroma. Therefore, we modified the Call Bias filter among our tumor sample alignments to account for differing percentages of tumor cellularity within each sample. A Call Bias of (0) is used when assuming a normal diploid distribution of alleles. However the Call Bias can be increased to allow for variant detection when alleles might fall outside of the normal diploid distribution, such as instances when tumor DNA contains contaminating normal stromal DNA. The parameters used in SolSNP variant detection are provided here. SolSNP documentation and descriptions of these parameters can be found at [solsnp.sourceforge.net](http://solsnp.sourceforge.net).

For Normal BAMs:  
STRAND\_MODE=GenotypeConsensus  
MINIMUM\_MAPQ=10  
FILTER=0.0  
MINIMUM\_BASE\_QUALITY=1  
PLOIDY=Diploid  
MINIMUM\_COVERAGE=3  
MAX\_MATE\_DISTANCE=2147483647  
MIN\_MATE\_DISTANCE=0  
CALL\_BIAS=0.0

For Tumor BAMs:  
STRAND\_MODE=VariantConsensus  
MINIMUM\_MAPQ=10  
FILTER=0.0  
MINIMUM\_BASE\_QUALITY=1  
PLOIDY=Diploid  
MINIMUM\_COVERAGE=3  
MAX\_MATE\_DISTANCE=2147483647  
MIN\_MATE\_DISTANCE=0

The Call Bias parameters changed across Tumor BAMs:

RA37 Call Bias=0.2  
RA53 Call Bias=0.5  
RA45 Call Bias=0.2  
RA49 Call Bias=0.5  
RA48 Call Bias=0.2

We also utilized a second variant detection algorithm to serve as an independent and redundant pipeline to provide additional support for variants. For this purpose, we employed the variant detection algorithm within the GATK suite (McKenna et al. 2010). The GATK variant detection tool uses a Bayesian method to compute the posterior probability for genotypes at a given base within the NGS sequence read pileup with an expected heterozygosity for the sample (McKenna et al. 2010). The parameters used for the GATK Unified Genotyper analysis in our study are provided here.

UG\_base\_model=EMPIRICAL  
UG\_cap\_base\_quality\_by\_mapping\_quality=false  
UG\_genotype=false  
UG\_genotype\_model=JOINT\_ESTIMATE  
UG\_heterozygosity=0.0010  
UG\_max\_deletion\_fraction=0.05  
UG\_max\_mismatches\_in\_40bp\_window=3  
UG\_min\_base\_quality\_score=10  
UG\_min\_mapping\_quality\_score=10

UG\_noSLOD=false  
UG\_output\_all\_callable\_bases=false  
UG\_platform=SOLID  
UG\_standard\_min\_confidence\_threshold\_for\_calling=30.0  
UG\_standard\_min\_confidence\_threshold\_for\_emitting=10.0  
UG\_trigger\_min\_confidence\_threshold\_for\_calling=30.0  
UG\_trigger\_min\_confidence\_threshold\_for\_emitting=30.0

The description for each parameter is available at the following web-page:  
[http://www.broadinstitute.org/gsa/wiki/index.php/Unified\\_genotyper](http://www.broadinstitute.org/gsa/wiki/index.php/Unified_genotyper).

### *Sequenome Mass Array*

We genotyped position chr1:11104624C>A (FRAP1 6809G>T mutation) and chr17:7517878C>T (TP53 785G>A mutation) in our sample set using the Sequenom MassARRAY™ platform with iPLEX™ chemistry. Briefly, iPLEX™ assays were designed utilizing the Sequenom Assay Design software, allowing for single base extension (SBE) designs used for multiplexing. PCR and SBE primer sequences are available upon request. Briefly, multiplex polymerase chain reactions (PCR) were performed to amplify 5-10 nanograms (ng) of genomic DNA. PCR reactions were treated with shrimp alkaline phosphatase (SAP) to neutralize unincorporated dNTPs. Subsequently, a post-PCR single base extension reaction was performed for each multiplex reaction using concentrations of 0.625 micromolar (mM) for low mass primers and 1.25 mM for high mass primers. Reactions were diluted with 16 microliters (ml) of H<sub>2</sub>O and fragments were purified with resin, spotted onto Sequenom SpectroCHIP™ microarrays and scanned by MALDI-TOF mass spectrometry. Individual SNP genotype calls were generated using Sequenom TYPER™ software, which automatically calls allele specific peaks according to their expected masses.
